# Supplementary material
Source: PubMed Central journal article supplement (PMC8722357)
Supplement: NIHMS1762743-supplement-1.pdf [file NIHMS1762743-supplement-1.pdf]

**Table S1.** Demographics, Gastric Emptying, and VAS appetite tests in rapid GE quartile group and rest GE (other 3 quartiles) group. Data shown in mean  $\pm$  SEM

|                                                                                                                                                                                                                                 | <b>Rapid</b><br>(n=33) | <b>Rest</b><br>(n=101) |                                     | <i>p value</i>        |
|---------------------------------------------------------------------------------------------------------------------------------------------------------------------------------------------------------------------------------|------------------------|------------------------|-------------------------------------|-----------------------|
| <b>Demographics</b>                                                                                                                                                                                                             |                        |                        |                                     |                       |
| Age, y                                                                                                                                                                                                                          | 38.57 $\pm$ 1.9        | 39.17 $\pm$ 0.9        |                                     | 0.77                  |
| Gender, Females (%)                                                                                                                                                                                                             | 22 (66.7)              | 68 (67.3)              |                                     | 0.94                  |
| Race, Caucasian (%)                                                                                                                                                                                                             | 30 (90.9) <sup>a</sup> | 99 (98) <sup>b</sup>   |                                     | 0.10                  |
| Weight, kg                                                                                                                                                                                                                      | 111.3 $\pm$ 4.7        | 109.9 $\pm$ 2          |                                     | 0.81                  |
| BMI, kg/m <sup>2</sup>                                                                                                                                                                                                          | 38.3 $\pm$ 1.1         | 37.8 $\pm$ 0.5         |                                     | 0.71                  |
| DEXA Total body fat, %                                                                                                                                                                                                          | 44.5 $\pm$ 1.5         | 45.1 $\pm$ 0.9         |                                     | 0.70                  |
| <b>GE</b>                                                                                                                                                                                                                       |                        |                        |                                     |                       |
| GE T $\frac{1}{2}$ , min                                                                                                                                                                                                        | 88.6 $\pm$ 2.3         | 126.7 $\pm$ 2.3        |                                     | <.0001                |
| <b>VAS Scores, mm</b>                                                                                                                                                                                                           |                        |                        |                                     |                       |
| <b>Hunger</b>                                                                                                                                                                                                                   |                        |                        | <b><math>\Delta</math> (95% CI)</b> | <b><i>p value</i></b> |
| Pre-meal                                                                                                                                                                                                                        | 57.4 $\pm$ 3.9         | 55.7 $\pm$ 1.6         | -1.7 (-10.4 - 6.9)                  | 0.69                  |
| Breakfast                                                                                                                                                                                                                       | 30.9 $\pm$ 4           | 25.8 $\pm$ 2           | -5 (-14 - 3.9)                      | 0.26                  |
| 30 min                                                                                                                                                                                                                          | 36.5 $\pm$ 4.1         | 29.8 $\pm$ 2           | -6.9 (-15.9 - 2.3)                  | 0.14                  |
| 60 min                                                                                                                                                                                                                          | 44.6 $\pm$ 4.4         | 36.5 $\pm$ 2.5         | -8 (-18.3 - 2.1)                    | 0.12                  |
| 90 min                                                                                                                                                                                                                          | 48.5 $\pm$ 4.1         | 41.4 $\pm$ 2.4         | -7.1 (-16.6 - 2.4)                  | 0.14                  |
| 120 min                                                                                                                                                                                                                         | 58.3 $\pm$ 3.9         | 49.6 $\pm$ 2.4         | -8.7 (-17.8 - 0.5)                  | <b>0.07</b>           |
| 240 min <sup>d</sup>                                                                                                                                                                                                            | 76.7 $\pm$ 2.2         | 69 $\pm$ 1.7           | -7.7 (-13.2 - -2.1)                 | <b>0.008</b>          |
| AUC(0–120 min), mm/min                                                                                                                                                                                                          | 218.3 $\pm$ 16.5       | 182.6 $\pm$ 9.5        | -35.7 (-73.9 - 2.6)                 | 0.07                  |
| AUC(0–240 min), mm/min                                                                                                                                                                                                          | 233.2 $\pm$ 12         | 201.7 $\pm$ 7.4        | -32 (-59.7 - -3.2)                  | <b>0.03</b>           |
| <b>Fullness</b>                                                                                                                                                                                                                 |                        |                        |                                     |                       |
| Pre-meal                                                                                                                                                                                                                        | 15.5 $\pm$ 3           | 11.8 $\pm$ 1.5         | -3.7 (-3.9 - 15.3)                  | 0.28                  |
| Breakfast                                                                                                                                                                                                                       | 56.3 $\pm$ 4.2         | 62.0 $\pm$ 2.2         | 5.7 (-3.8 - 15.2)                   | 0.23                  |
| 30 min                                                                                                                                                                                                                          | 49.8 $\pm$ 4.2         | 56 $\pm$ 2.3           | 6.2 (-3.3 - 15.7)                   | 0.19                  |
| 60 min                                                                                                                                                                                                                          | 49 $\pm$ 4.3           | 52.7 $\pm$ 2.3         | 3.7 (-6 - 13.4)                     | 0.44                  |
| 90 min                                                                                                                                                                                                                          | 40.5 $\pm$ 4.2         | 47.4 $\pm$ 2.4         | 6.9 (-2.7 - 16.7)                   | 0.15                  |
| 120 min                                                                                                                                                                                                                         | 35.3 $\pm$ 3.9         | 39.6 $\pm$ 2.3         | 4.3 (-4.7 - 13.3)                   | 0.34                  |
| 240 min <sup>d</sup>                                                                                                                                                                                                            | 18.1 $\pm$ 2.2         | 20.8 $\pm$ 1.4         | 2.7 (-2.6 - 7.9)                    | 0.31                  |
| AUC(0–120 min), mm/min                                                                                                                                                                                                          | 231.7 $\pm$ 19.1       | 258.4 $\pm$ 9.6        | 26.7 (-16.3 - 69.7)                 | 0.22                  |
| AUC(0–240 min), mm/min                                                                                                                                                                                                          | 154.9 $\pm$ 13.2       | 172.8 $\pm$ 6.9        | 18 (-12.1 - 47.9)                   | 0.21                  |
| <b>OAS</b>                                                                                                                                                                                                                      |                        |                        |                                     |                       |
| 120 min                                                                                                                                                                                                                         | 39 $\pm$ 3.5           | 43.5 $\pm$ 2           | 16.9 (-3.7 - 12.7)                  | 0.28                  |
| 240 min                                                                                                                                                                                                                         | 22.6 $\pm$ 2.13        | 26 $\pm$ 1.3           | 3.4 (-1.6 - 8.5)                    | 0.18                  |
| AUC(0–120 min), mm/min                                                                                                                                                                                                          | 151.7 $\pm$ 10.7       | 168.5 $\pm$ 6.1        | 25.8 (-10.2 - 61.8)                 | 0.15                  |
| AUC(0–240 min), mm/min                                                                                                                                                                                                          | 39 $\pm$ 3.5           | 43.5 $\pm$ 2           | 4.5 (-7.8 - 41.6)                   | 0.17                  |
| Abbreviations: $\Delta$ , mean difference between rapid and rest groups; CI, confidence interval; BMI, body mass index; GE, gastric emptying; VAS, visual analog scale; AUC, area under the curve; OAS, overall appetite score. |                        |                        |                                     |                       |
| a) 6% Asian, 3% African American                                                                                                                                                                                                |                        |                        |                                     |                       |
| b) 2% Asian                                                                                                                                                                                                                     |                        |                        |                                     |                       |
